# Supplementary material for: Reproducibility and Relative Validity of a Short Food Frequency Questionnaire for Chinese Older Adults in Hong Kong
Source: MDPI journal article supplement (doi:10.3390/nu16081132), 2024-04-11
Supplement: s1 [file s1]

**Table S1.** The agreement between FFQ1 and three-day dietary records by Bland–Altman analysis.

| Parameters              | Crude  |                  |           |
|-------------------------|--------|------------------|-----------|
|                         | Mean   | 95% LOA          | Rate (%)* |
| Total dietary fiber (g) | 1.17   | -6.13, 8.48      | 5.05      |
| Total sugar (g)         | -0.48  | -30.41, 29.44    | 3.54      |
| Saturated fat (g)       | 2.26   | -6.47, 10.99     | 5.56      |
| Trans fat (g)           | -0.19  | -0.64, 0.26      | 5.05      |
| Cholesterol (mg)        | 57.67  | -132.27, 247.62  | 4.04      |
| Water (g)               | 6.00   | -899.01, 911.02  | 4.55      |
| Vitamin C (mg)          | 7.08   | -96.75, 110.91   | 4.55      |
| Calcium (mg)            | -49.75 | -444.09, 344.59  | 7.07      |
| Copper (mg)             | 0.25   | -0.44, 0.95      | 5.05      |
| Iron (mg)               | -0.99  | -8.26, 6.28      | 4.55      |
| Magnesium (mg)          | -5.03  | -122.11, 112.05  | 5.05      |
| Manganese (mg)          | -0.50  | -2.57, 1.56      | 5.56      |
| Phosphorus (mg)         | -11.95 | -426.76, 402.86  | 4.04      |
| Potassium (mg)          | 171.35 | -802.51, 1145.21 | 5.05      |
| Sodium (mg)             | 639.14 | -931.89, 2210.17 | 5.05      |
| Zinc (mg)               | 0.37   | -6.00, 6.73      | 3.03      |

Abbreviations: FFQ, food frequency questionnaire; LOA, limit of agreement.

\* Percentage of subjects with values out of limits of agreement.
